# Supplementary material for: Quantitative GC–TCD Measurements of Major Flatus Components: A Preliminary Analysis of the Diet Effect
Source: Sensors (Basel). 2022 Jan 22;22(3):838. doi: 10.3390/s22030838 (PMC8840200; doi:10.3390/s22030838)
Supplement: Supplementary file 1 [file sensors-22-00838-s001.zip › sensors-1546263-supplementary.pdf]

## Supplementary Material

Figure S1: Baseline correction and alignment for Hydrogen TCD measurement

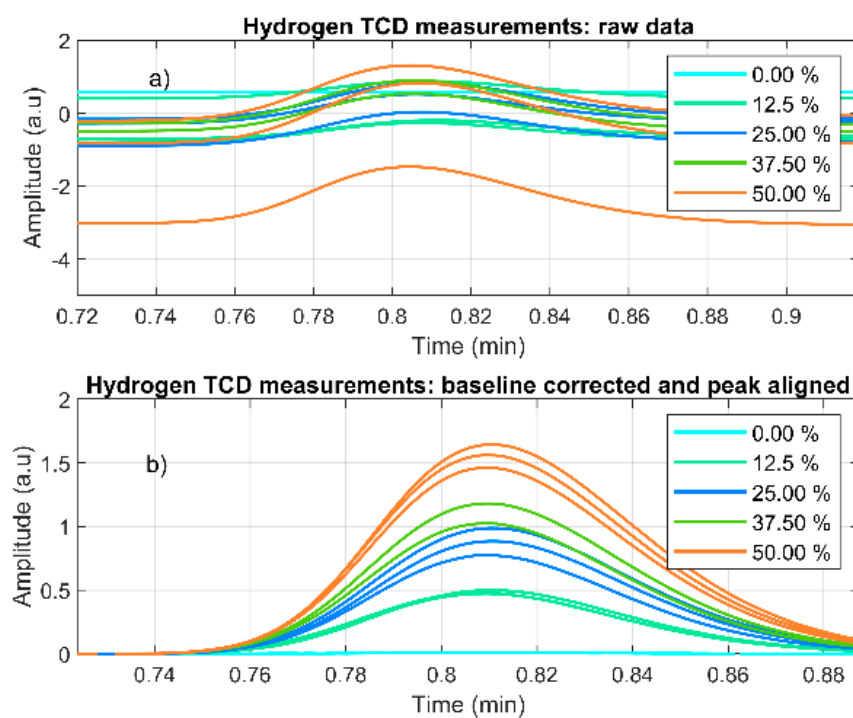

- (a) Raw Hydrogen TCD measurements. A misalignment of the peaks and different baseline levels can be observed.
- (b) Hydrogen TCD measurements after baseline correction and peak alignment

Figure S2: Baseline correction and alignment for Oxygen TCD measurement

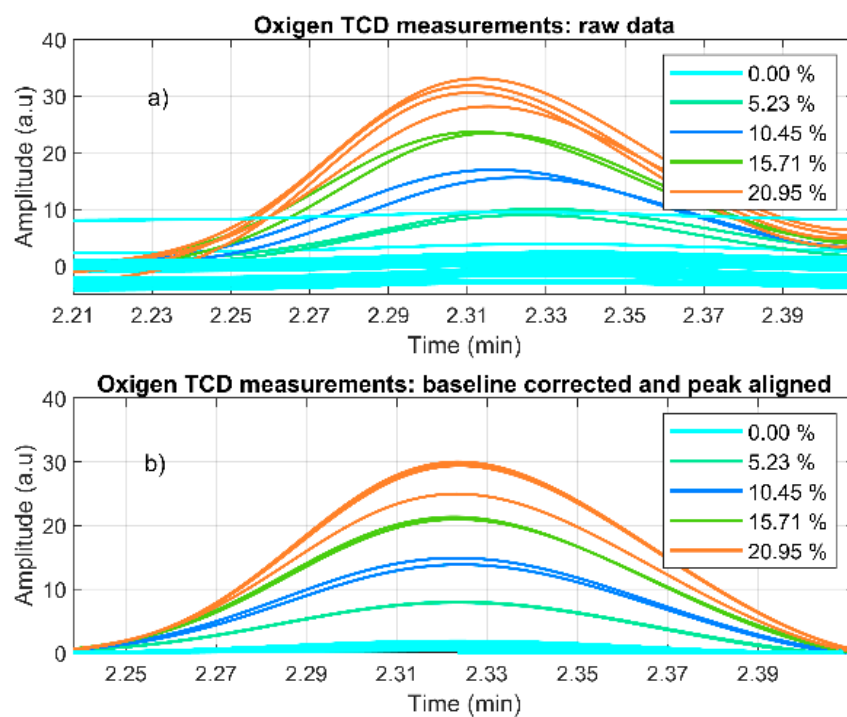

- (a) Raw Oxygen TCD measurements. A misalignment of the peaks and different baseline levels can be observed
- (b) Oxygen TCD measurements after baseline correction and peak alignment

Figure S3: Baseline correction and alignment for Nitrogen TCD measurement

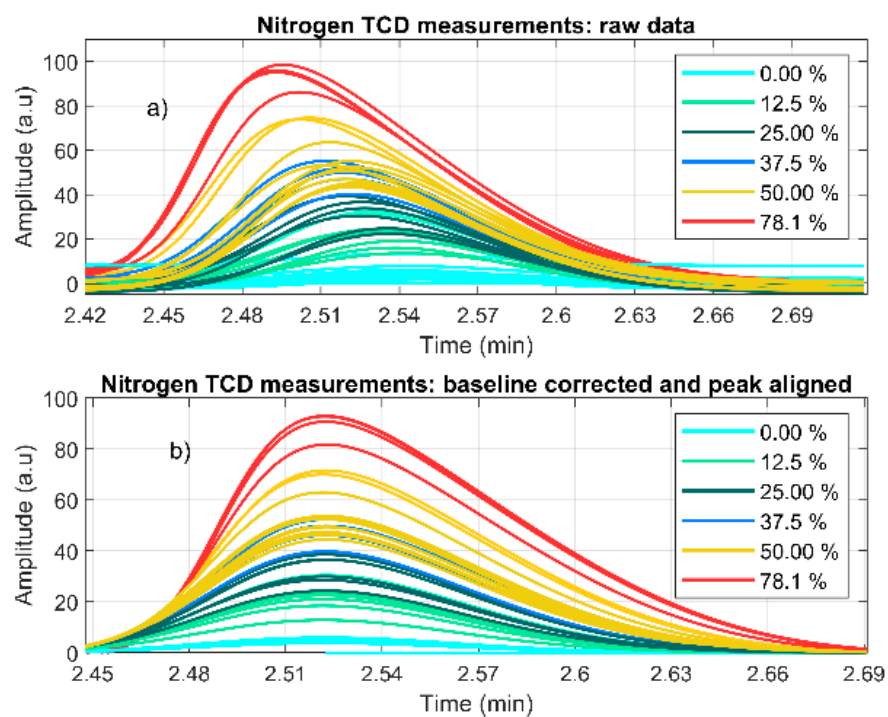

- (a) Raw Nitrogen TCD measurements. A misalignment of the peaks and different baseline levels can be observed;
- (b) Nitrogen TCD measurements after baseline correction and peak alignment

Figure S4: Baseline correction and alignment for Methane TCD measurement

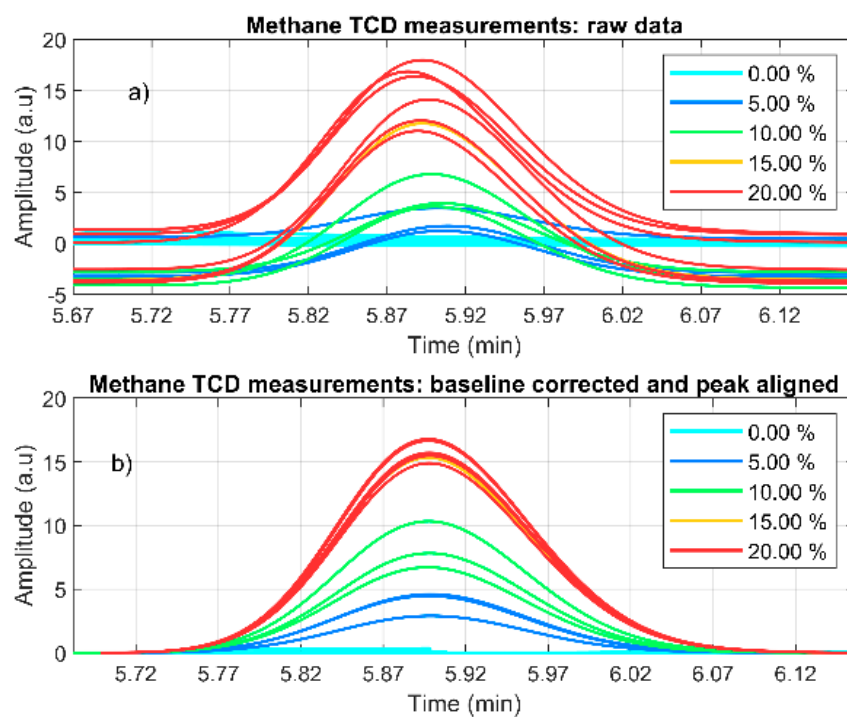

- (a) Raw Methane TCD measurements. A misalignment of the peaks and different baseline levels can be observed;
- (b) Methane TCD measurements after baseline correction and peak alignment

Table S1: Healthy subjects submitted to low flatulogenic diet and high flatulogenic diet. The 5 major gases concentration is reported jointly the 95% confidence interval. Also, some biometric parameters are added: age, sex, and IMC of every subject. A total amount of 20 measures has been performed

| Sex    | Age | IMC  | Vol. (ml) | Diet    |                 | H <sub>2</sub> | O <sub>2</sub> | N <sub>2</sub> | CH <sub>4</sub> | CO <sub>2</sub> |
|--------|-----|------|-----------|---------|-----------------|----------------|----------------|----------------|-----------------|-----------------|
| Female | 32  | 21.3 | 43        | Fibre   | Measure 1 (%)   | 0.0            | 36.2           | 34.7           | 20.7            | 8.56            |
|        |     |      |           |         | Conf. Inter.(%) | -0.5, 0.5      | 35.6, 37.5     | 30.3, 39.0     | 20.5, 22.0      | 7.7, 8.8        |
|        |     |      |           |         | Measure 2 (%)   | 0.0            | 36.7           | 34.9           | 20.2            | 8.2             |
|        |     |      | 34        | Protein | Conf. Inter.(%) | -0.5, 0.5      | 36.2, 38.1     | 30.5, 39.2     | 20.0, 21.5      | 7.4, 8.5        |
|        |     |      |           |         | Measure 1 (%)   | 1.4            | 6.5            | 65.4           | 22.1            | 4.6             |
|        |     |      |           |         | Conf. Inter.(%) | 0.8, 1.9       | 6.2, 6.9       | 59.1, 71.6     | 21.9, 23.5      | 4.0, 4.9        |
| Male   | 31  | 24.7 | 555       | Fibre   | Measure 2 (%)   | 1.4            | 6.91           | 65.3           | 21.8            | 4.5             |
|        |     |      |           |         | Conf. Inter.(%) | 0.85, 2.0      | 6.7, 7.3       | 50.1, 71.2     | 21.6, 23.1      | 3.9, 4.8        |
|        |     |      | 380       | Protein | Measure 1 (%)   | 0.5            | 7.8            | 31.4           | 44.1            | 16.3            |
|        |     |      |           |         | Conf. Inter.(%) | -0.0, 1.1      | 7.5, 8.2       | 27.2, 35.5     | 43.8, 46.5      | 14.9, 16.5      |
|        |     |      |           |         | Measure 2 (%)   | 0.5            | 8.0            | 31.4           | 43.9            | 16.2            |
|        |     |      |           |         | Conf. Inter.(%) | -0.1, 1.0      | 7.7, 8.4       | 27.3, 35.5     | 43.7, 46.4      | 14.8, 16.5      |
| Male   | 30  | 26.1 | 780       | Fibre   | Measure 1 (%)   | 0.0            | 0.6            | 51.6           | 40.6            | 7.5             |
|        |     |      |           |         | Conf. Inter.(%) | -0.5, 0.5      | 0.4, 0.8       | 46.2, 57.0     | 40.5, 42.8      | 6.7, 7.7        |
|        |     |      | 439       | Protein | Measure 2 (%)   | 0.0            | 0.6            | 51.4           | 40.5            | 7.5             |
|        |     |      |           |         | Conf. Inter.(%) | -0.5, 0.5      | 0.4, 0.8       | 46.0, 56.8     | 40.4, 42.8      | 6.3, 7.8        |
|        |     |      |           |         | Measure 1 (%)   | 0.0            | 1.0            | 46.1           | 15.6            | 37.5            |
|        |     |      |           |         | Conf. Inter.(%) | -0.5, 0.5      | 0.9, 1.2       | 41.0, 51.1     | 15.4, 16.6      | 34.7, 37.7      |
| Female | 29  | 23.5 | 148       | Fibre   | Measure 2 (%)   | 0.0            | 0.2            | 44.9           | 16.3            | 39.0            |
|        |     |      |           |         | Conf. Inter.(%) | -0.5, 0.5      | 0.0, 0.4       | 40.0, 49.9     | 16.0, 17.3      | 36.1, 39.3      |
|        |     |      | 82        | Protein | Measure 1 (%)   | 0.0            | 0.1            | 57.3           | 24.6            | 18.2            |
|        |     |      |           |         | Conf. Inter.(%) | -0.5, 0.5      | -0.0, 0.3      | 51.5, 63.0     | 24.4, 26.1      | 16.7, 18.4      |
|        |     |      |           |         | Measure 2 (%)   | 0.0            | 0.0            | 55.5           | 26.1            | 19.3            |
|        |     |      |           |         | Conf. Inter.(%) | -0.5, 0.5      | -0.2, 0.2      | 49.8, 61.1     | 25.9, 27.7      | 17.7, 19.6      |
| Female | 36  | 18.6 | 92        | Fibre   | Measure 1 (%)   | 3.0            | 1.6            | 48.6           | 37.2            | 9.5             |
|        |     |      |           |         | Conf. Inter.(%) | 2.4, 3.6       | 1.4, 1.8       | 43.4, 53.8     | 37.0, 39.3      | 8.6, 9.8        |
|        |     |      | 40        | Protein | Measure 2 (%)   | 2.7            | 1.9            | 49.5           | 36.6            | 9.3             |
|        |     |      |           |         | Conf. Inter.(%) | 2.0, 3.3       | 1.7, 2.2       | 44.2, 54.8     | 36.4, 38.6      | 8.4, 9.6        |
|        |     |      |           |         | Measure 1 (%)   | 0.0            | 7.2            | 51.3           | 33.6            | 8.2             |
|        |     |      |           |         | Conf. Inter.(%) | -0.5, 0.5      | 6.9, 7.6       | 45.9, 56.6     | 33.4, 35.6      | 7.3, 8.5        |
| Female | 36  | 18.6 | 92        | Fibre   | Measure 2 (%)   | 0.0            | 7.0            | 51.5           | 33.2            | 8.3             |
|        |     |      |           |         | Conf. Inter.(%) | -0.5, 0.5      | 6.7, 7.4       | 46.2, 56.9     | 33.0, 35.1      | 7.5, 8.6        |
|        |     |      | 40        | Protein | Measure 1 (%)   | 2.1            | 0.0            | 57.7           | 26.5            | 12.5            |
|        |     |      |           |         | Conf. Inter.(%) | 1.5, 2.7       | -0.2, 0.2      | 52.0, 63.5     | 26.3, 28.1      | 11.4, 12.8      |
|        |     |      |           |         | Measure 2 (%)   | 1.9            | 0.3            | 56.3           | 27.9            | 13.3            |
|        |     |      |           |         | Conf. Inter.(%) | 1.3, 2.5       | 0.2, 0.5       | 50.1, 62.1     | 27.7, 29.6      | 12.2, 13.6      |
| Female | 36  | 18.6 | 92        | Fibre   | Measure 1 (%)   | 0.8            | 2.3            | 64.8           | 22.9            | 9.2             |
|        |     |      |           |         | Conf. Inter.(%) | 0.2, 1.3       | 2.1, 2.6       | 58.6, 71.0     | 22.6, 24.3      | 8.3, 9.5        |
|        |     |      | 40        | Protein | Measure 2 (%)   | 0.9            | 3.0            | 65.2           | 22.2            | 8.8             |
|        |     |      |           |         | Conf. Inter.(%) | 0.3, 1.4       | 2.8, 3.3       | 58.9, 71.4     | 21.9, 23.5      | 7.9, 9.1        |
|        |     |      |           |         | Measure 1 (%)   | 0.0            | 0.0            | 57.7           | 26.5            | 12.5            |
|        |     |      |           |         | Conf. Inter.(%) | 1.5, 2.7       | -0.2, 0.2      | 52.0, 63.5     | 26.3, 28.1      | 11.4, 12.8      |
